# Supplementary material
Source: Research Square preprint supplement (doi:10.21203/rs.3.rs-9149545/v1)
Supplement: Supplementary file 1 [file 366637ff8fac544f8692c5f3.docx]

**Supplementary Figure and Table Legend**

**Figure S1.** Inclusion and exclusion criteria to select eligible CRC patients treated by endoscopic electrocautery and segmental resection.

**Figure S2.** The standardized mean differences of included variables before and after PSM.

**Table S1.** No. of patients treated by different therapies.

**Table S2.** Characteristics of CRC patients treated with endoscopic electrocautery from 2000 to 2017 after PSM matching.


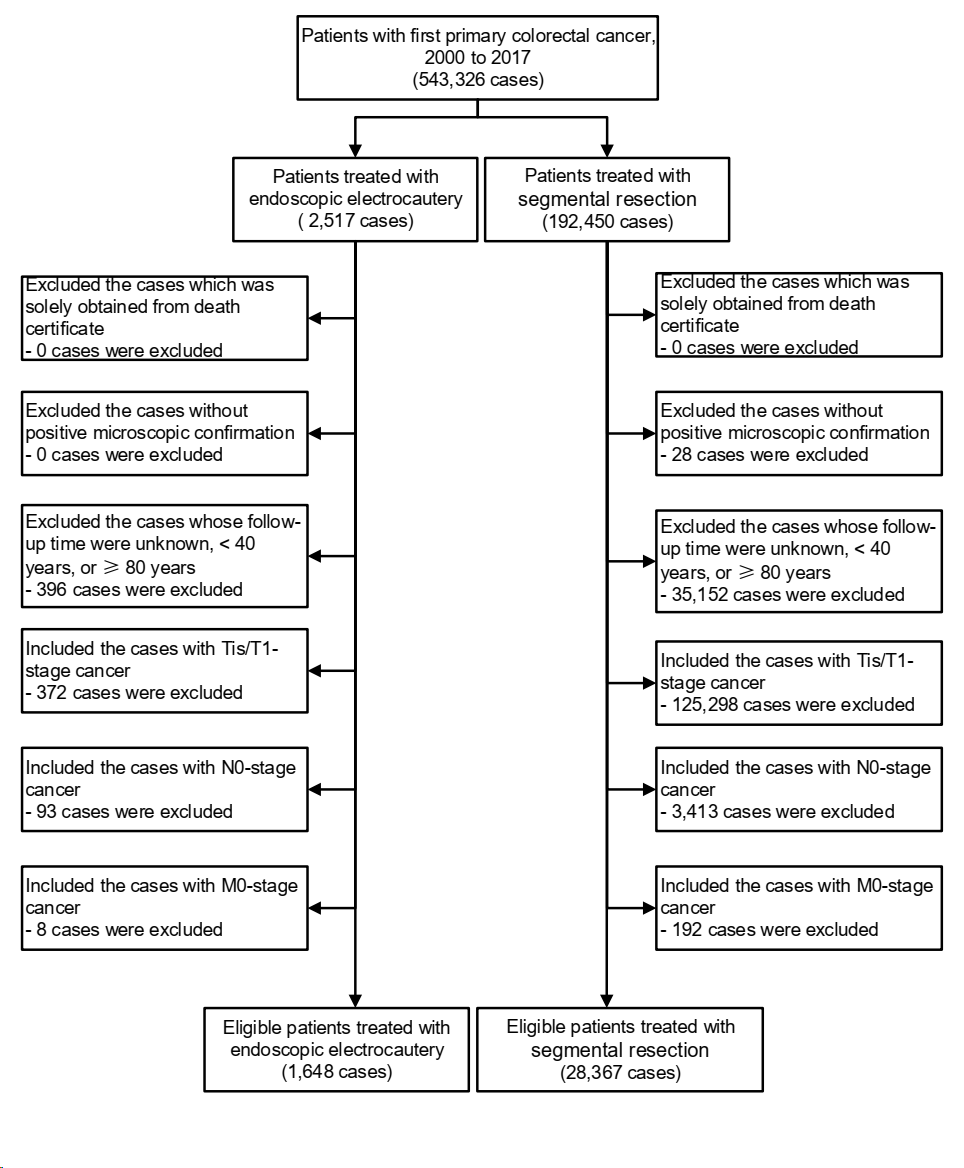


**Figure S1.** Inclusion and exclusion criteria to select eligible CRC patients treated by endoscopic electrocautery and segmental resection.


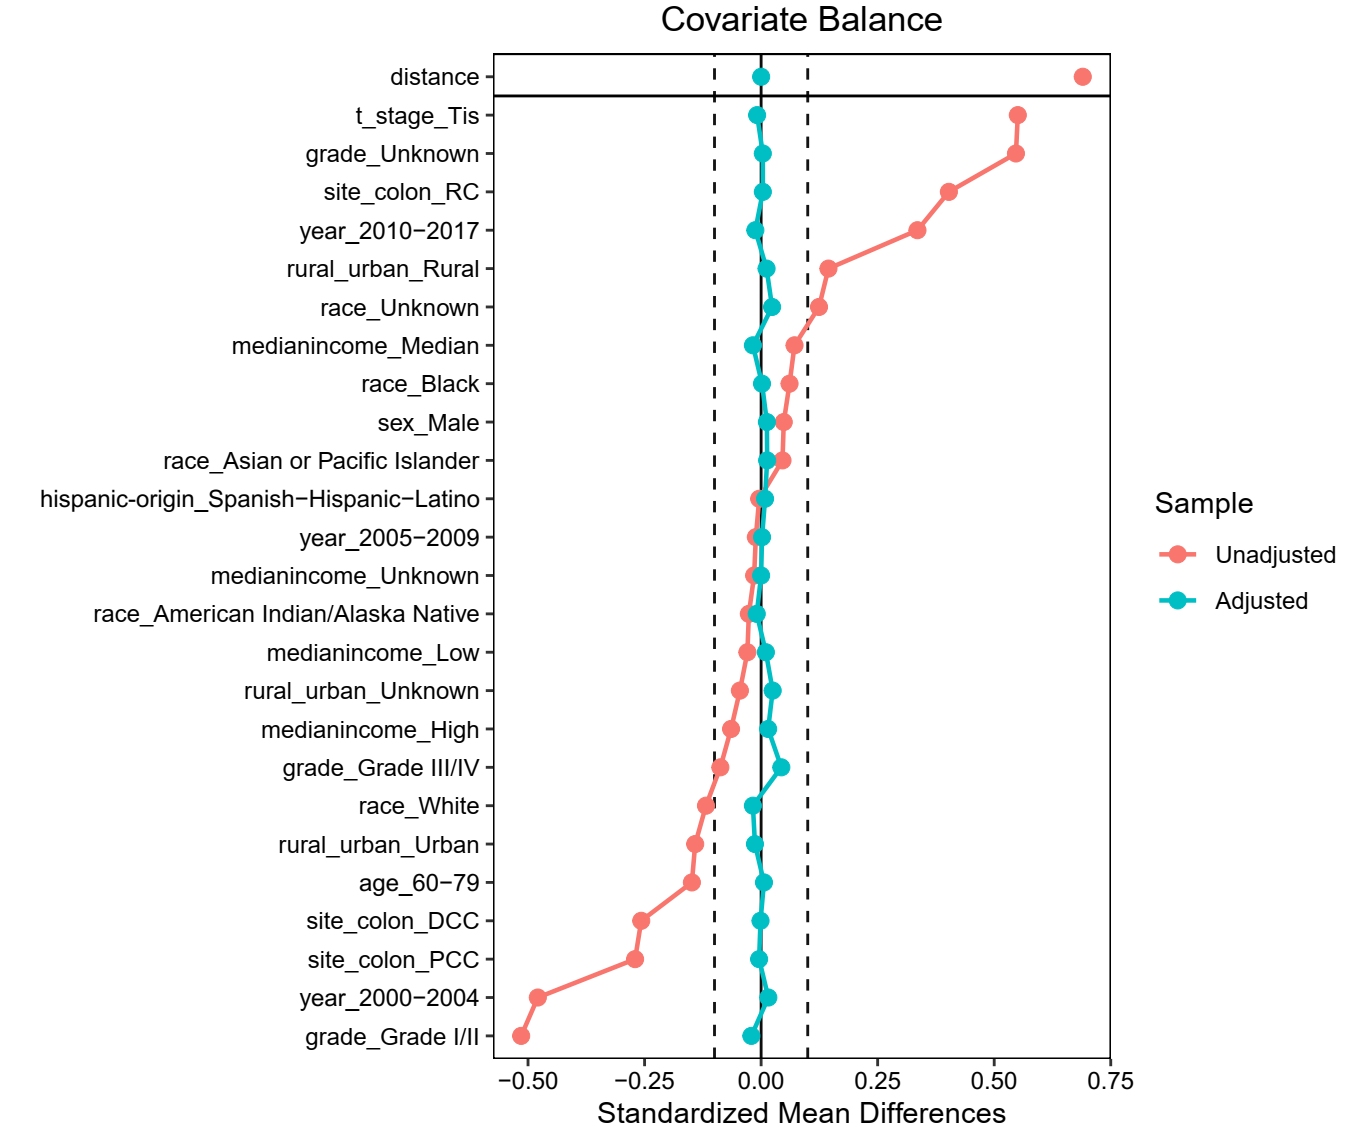


**Figure S2.** The standardized mean differences of included variables before and after PSM.

**Table S1.** No. of patients treated by different therapies.

| Interventions | No. of patients1 | % |
| --- | --- | --- |
| None | 5,404 | 9.7% |
| Local destruction | 67 | 0.1% |
| Electrocautery | 1,648 | 3.0% |
| Segmental resection | 28,367 | 50.8% |
| Radical surgery | 20,348 | 36.4% |
| Total | 55,834 | 100% |

1 Included all Tis/T1-stage CRC patients in the SEER program.

**Table S2.** Characteristics of CRC patients treated with endoscopic electrocautery from 2000 to 2017 after PSM matching.

| Characteristics | All patients (%) | Endoscopic electrocautery (%) | Segmental resection (%) | p1 |
| --- | --- | --- | --- | --- |
| Total | 4,847 (100%) | 1,635 (100%) | 3,212 (100%) |  |
| Age at diagnosis |  |  |  | 0.9 |
| 40-59 | 2,299 (47.4%) | 774 (47.3%) | 1,525 (47.5%) |  |
| 60-79 | 2,548 (52.6%) | 861 (52.7%) | 1,687 (52.5%) |  |
| Sex |  |  |  | 0.6 |
| Female | 2,063 (42.6%) | 687 (42%) | 1,376 (42.8%) |  |
| Male | 2,784 (57.4%) | 948 (58%) | 1,836 (57.2%) |  |
| Race |  |  |  | 0.9 |
| White | 3,679 (75.9%) | 1,232 (75.4%) | 2,447 (76.2%) |  |
| Black | 564 (11.6%) | 191 (11.7%) | 373 (11.6%) |  |
| American Indian/Alaska Native | 21 (0.4%) | 7 (0.4%) | 14 (0.4%) |  |
| Asian or Pacific Islander | 492 (10.2%) | 170 (10.4%) | 322 (10%) |  |
| Unknown | 91 (1.9%) | 35 (2.1%) | 56 (1.7%) |  |
| Hispanic origin |  |  |  | 0.8 |
| Non-Hispanic | 4,403 (90.8%) | 1,483 (90.7%) | 2,920 (90.9%) |  |
| Hispanic | 444 (9.2%) | 152 (9.3%) | 292 (9.1%) |  |
| Year of diagnosis |  |  |  | 1 |
| 2000-2004 | 622 (12.8%) | 213 (13%) | 409 (12.7%) |  |
| 2005-2009 | 1,457 (30.1%) | 489 (29.9%) | 968 (30.1%) |  |
| 2010-2017 | 2,768 (57.1%) | 933 (57.1%) | 1,835 (57.1%) |  |
| Rural/Urban status |  |  |  | 0.2 |
| Rural | 868 (17.9%) | 305 (18.7%) | 563 (17.5%) |  |
| Urban | 3,978 (82.1%) | 1,329 (81.3%) | 2,649 (82.5%) |  |
| Unknown | 1 (0%) | 1 (0.1%) | 0 (0%) |  |
| Median household income |  |  |  | 0.9 |
| Low | 68 (1.4%) | 24 (1.5%) | 44 (1.4%) |  |
| Median | 3,475 (71.7%) | 1,165 (71.3%) | 2,310 (71.9%) |  |
| High | 1,304 (26.9%) | 446 (27.3%) | 858 (26.7%) |  |
| Unknown |  |  |  | 0.8 |
| AJCC T stage | 2,365 (48.8%) | 803 (49.1%) | 1,562 (48.6%) |  |
| Tis | 2,482 (51.2%) | 832 (50.9%) | 1,650 (51.4%) |  |
| T1 |  |  |  | 0.2 |
| Grade | 2,251 (46.4%) | 739 (45.2%) | 1,512 (47.1%) |  |
| Grade I/II | 173 (3.6%) | 67 (4.1%) | 106 (3.3%) |  |
| Grade III/IV | 2,423 (50%) | 829 (50.7%) | 1,594 (49.6%) |  |
| Ungraded |  |  |  | 0.9 |
| Anatomic sites | 448 (9.2%) | 148 (9.1%) | 300 (9.3%) |  |
| PCC | 144 (3%) | 33 (2%) | 111 (3.5%) |  |
| Cecum | 145 (3%) | 58 (3.5%) | 87 (2.7%) |  |
| Ascending Colon | 36 (0.7%) | 18 (1.1%) | 18 (0.6%) |  |
| Hepatic Flexure | 123 (2.5%) | 39 (2.4%) | 84 (2.6%) |  |
| Transverse Colon | 1,725 (35.6%) | 576 (35.2%) | 1,149 (35.8%) |  |
| DCC | 68 (1.4%) | 11 (0.7%) | 57 (1.8%) |  |
| Splenic Flexure | 169 (3.5%) | 69 (4.2%) | 100 (3.1%) |  |
| Descending Colon | 1,488 (30.7%) | 496 (30.3%) | 992 (30.9%) |  |
| Sigmoid Colon | 2,674 (55.2%) | 911 (55.7%) | 1,763 (54.9%) |  |
| RC | 740 (15.3%) | 96 (5.9%) | 644 (20%) |  |
| Rectosigmoid Junction | 1,934 (39.9%) | 815 (49.8%) | 1,119 (34.8%) |  |
| Rectum | 4,847 (100%) | 1,635 (100%) | 3,212 (100%) |  |

Notes:

1 The p-values were calculated by Fisher exact test or Person chi2 test. The p-values were 2-sides.
